# Supplementary material for: High Content Analysis of Human Pluripotent Stem Cell Derived Hepatocytes Reveals Drug Induced Steatosis and Phospholipidosis
Source: Hindawi journal article supplement (doi:10.1155/2016/2475631), 2016-01-01
Supplement: f1 [file 2475631.f1.pdf]

## Supplementary - I

Table 1: Scoring sheet to estimate the degree of injury

| Compounds        | Model system | FIXED   |    |      |                |    |      |               |    |      | LIVE    |     |      | Severity |     |    |    |
|------------------|--------------|---------|----|------|----------------|----|------|---------------|----|------|---------|-----|------|----------|-----|----|----|
|                  |              | Nucleus |    |      | Neutral Lipids |    |      | Phospholipids |    |      | Nucleus | MMP | ROS  |          | PMP |    |    |
|                  |              | CC      | MI | Area | C              | MI | Area | C             | MI | Area | CC      | MI  | Area |          | MI  | MI | MI |
| Amiodarone HCL   | hiPS HEP     | 3       | 0  | 0    | 3              | 1  | 0    | 3             | 0  | 1    | 3       | 3   | 0    | 0        | 3   | 0  | 20 |
|                  | HepG2        | 3       | 1  | 1    | 2              | 3  | 0    | 0             | 0  | 1    | 3       | 2   | 1    | 1        | 1   | 1  | 20 |
| Doxycycline      | hiPS HEP     | 1       | 0  | 0    | 2              | 1  | 0    | 0             | 0  | 0    | 1       | 0   | 2    | 0        | 0   | 1  | 8  |
|                  | HepG2        | 1       | 0  | 0    | 1              | 0  | 0    | 1             | 0  | 0    | 0       | 0   | 0    | 0        | 0   | 0  | 3  |
| Tetracycline HCL | hiPS HEP     | 0       | 0  | 0    | 2              | 0  | 0    | 1             | 0  | 0    | 0       | 0   | 0    | 0        | 0   | 0  | 4  |
|                  | HepG2        | 0       | 0  | 0    | 2              | 1  | 0    | 0             | 0  | 0    | 0       | 0   | 0    | 0        | 0   | 0  | 4  |
| Sodium Citrate   | hiPS HEP     | 0       | 0  | 0    | 0              | 0  | 0    | 0             | 0  | 0    | 0       | 0   | 0    | 0        | 0   | 0  | 0  |
|                  | HepG2        | 0       | 0  | 0    | 0              | 0  | 0    | 1             | 0  | 0    | 0       | 0   | 0    | 0        | 0   | 0  | 1  |

In order to classify compounds according to its toxicity potential, the level of change was calculated for each parameter at isomolar concentration of 100  $\mu$ M (except for Amiodarone HCL at 125  $\mu$ M). The scoring sheet used to estimate the degree of injury was adapted from Tolosa et al. (18). Four different scores were assigned according to the level of variation when compared to the vehicle control; 0 (variation lower than 20%), 1 (variation  $\pm$  20-40%), 2 (variation  $\pm$  40-60%), and 3 (variation  $\pm$  60-100%). The percentage change for steatosis and phospholipidosis were in a different range, so different levels were established. The scores were assigned as; 0 (variation lower than 25%), 1 (variation 25-150%), 2 (variation 150-300%), and 3 (variation >300%). The individual scores for each parameter were summed up to estimate the degree of injury of the compound. The compounds were classified based on the degree of

injury as severely toxic ( $\geq 15$ ), moderately toxic (6-15), mildly toxic (1-5) and non-toxic. The order in which the compounds were classified was compared between hiPSC derived hepatocytes (hiPS HEP) and HepG2 cell lines.
